# Supplementary material
Source: publisher figshare collection journal article supplement (https://sage.figshare.com/ndownloader/files/18918911)
Supplement: Supplementary file 1 [file 18918911]

Online Appendix

Table 2a: Scope of Youth and non-youth Actors making youth related claims, by country

| Country |  | Actor Scope (N) | |  |
| --- | --- | --- | --- | --- |
| nonYouth/Youth Actor | National | Subnational | Nat/Subn Ratio |
| France | NonYouth | 67,53 | 32,47 | 2,08 |
| Youth | 60,76 | 39,24 | 1,55 |
| **Total** | **65,24** | **34,76** | **1,88** |
| Germany | NonYouth | 46,23 | 53,77 | 0,86 |
| Youth | 25,74 | 74,26 | 0,35 |
| **Total** | **41,98** | **58,02** | **0,72** |
| Greece | NonYouth | 63,69 | 36,31 | 1,75 |
| Youth | 22,31 | 77,69 | 0,29 |
| **Total** | **52,41** | **47,59** | **1,10** |
| Italy | NonYouth | 37,10 | 62,90 | 0,59 |
| Youth | 27,34 | 72,66 | 0,38 |
| **Total** | **34,46** | **65,54** | **0,53** |
| Poland | NonYouth | 76,61 | 23,39 | 3,27 |
| Youth | 64,79 | 35,21 | 1,84 |
| **Total** | **74,78** | **25,22** | **2,97** |
| Spain | NonYouth | 45,13 | 54,87 | 0,82 |
| Youth | 39,36 | 60,64 | 0,65 |
| **Total** | **44,01** | **55,99** | **0,79** |
| Sweden | NonYouth | 53,59 | 46,41 | 1,15 |
| Youth | 37,14 | 62,86 | 0,59 |
| **Total** | **51,23** | **48,77** | **1,05** |
| Switzerland | NonYouth | 36,72 | 63,28 | 0,58 |
| Youth | 37,21 | 62,79 | 0,59 |
| **Total** | **36,81** | **63,19** | **0,58** |
| UK | NonYouth | 84,49 | 15,51 | 5,45 |
| Youth | 46,15 | 53,85 | 0,86 |
| **Total** | **82,31** | **17,69** | **4,65** |
| Total | NonYouth | 67,53 | 32,47 | 2,08 |
| Youth | 60,76 | 39,24 | 1,55 |
| **Total** | **65,24** | **34,76** | **1,88** |

Table 3a: Actor types by actor scope and by country

| Country | Claimant Actor Type | Actor Scope | |  |
| --- | --- | --- | --- | --- |
|  |  | National | Subnational | National/Subnat. Ratio |
| **France** | State actors and judiciary | 73,17 | 26,83 | 2,73 |
|  | Political parties/groups | 86,84 | 13,16 | 6,60 |
|  | Professional organizations/groups | 70,27 | 29,73 | 2,36 |
|  | Labor organizations and Economy groups | 89,47 | 10,53 | 8,50 |
|  | Education related actors | 26,19 | 73,81 | 0,35 |
|  | Youth Actors | 60,76 | 39,24 | 1,55 |
|  | Other Actors | 63,27 | 36,73 | 1,72 |
|  | Total | 65,24 | 34,76 | 1,88 |
| **Germany** | State actors and judiciary | 34,26 | 65,74 | 0,52 |
|  | Political parties/groups | 26,15 | 73,85 | 0,35 |
|  | Professional organizations/groups | 90,00 | 10,00 | 9,00 |
|  | Labor organizations and Economy groups | 82,61 | 17,39 | 4,75 |
|  | Education related actors | 47,25 | 52,75 | 0,90 |
|  | Youth Actors | 25,74 | 74,26 | 0,35 |
|  | Other Actors | 51,47 | 48,53 | 1,06 |
|  | Total | 41,98 | 58,02 | 0,72 |
| **Greece** | State actors and judiciary | 73,60 | 26,40 | 2,79 |
|  | Political parties/groups | 100,00 |  |  |
|  | Professional organizations/groups | 58,82 | 41,18 | 1,43 |
|  | Labor organizations and Economy groups | 65,63 | 34,38 | 1,91 |
|  | Education related actors | 32,84 | 67,16 | 0,49 |
|  | Youth Actors | 22,31 | 77,69 | 0,29 |
|  | Other Actors | 48,39 | 51,61 | 0,94 |
|  | Total | 52,41 | 47,59 | 1,10 |
| **Italy** | State actors and judiciary | 36,76 | 63,24 | 0,58 |
|  | Political parties/groups | 60,98 | 39,02 | 1,56 |
|  | Professional organizations/groups | 68,00 | 32,00 | 2,13 |
|  | Labor organizations and Economy groups | 76,92 | 23,08 | 3,33 |
|  | Education related actors | 8,16 | 91,84 | 0,09 |
|  | Youth Actors | 27,34 | 72,66 | 0,38 |
|  | Other Actors | 27,16 | 72,84 | 0,37 |
|  | Total | 34,46 | 65,54 | 0,53 |
| **Poland** | State actors and judiciary | 78,20 | 21,80 | 3,59 |
|  | Political parties/groups | 85,19 | 14,81 | 5,75 |
|  | Professional organizations/groups | 93,94 | 6,06 | 15,50 |
|  | Labor organizations and Economy groups | 84,21 | 15,79 | 5,33 |
|  | Education related actors | 53,57 | 46,43 | 1,15 |
|  | Youth Actors | 64,79 | 35,21 | 1,84 |
|  | Other Actors | 65,57 | 34,43 | 1,90 |
|  | Total | 74,78 | 25,22 | 2,97 |
| **Spain** | State actors and judiciary | 35,76 | 64,24 | 0,56 |
|  | Political parties/groups | 50,82 | 49,18 | 1,03 |
|  | Professional organizations/groups | 72,41 | 27,59 | 2,63 |
|  | Labor organizations and Economy groups | 66,67 | 33,33 | 2,00 |
|  | Education related actors | 33,33 | 66,67 | 0,50 |
|  | Youth Actors | 39,36 | 60,64 | 0,65 |
|  | Other Actors | 60,71 | 39,29 | 1,55 |
|  | Total | 44,01 | 55,99 | 0,79 |
| **Sweden** | State actors and judiciary | 49,38 | 50,63 | 0,98 |
|  | Political parties/groups | 75,00 | 25,00 | 3,00 |
|  | Professional organizations/groups | 63,08 | 36,92 | 1,71 |
|  | Labor organizations and Economy groups | 89,47 | 10,53 | 8,50 |
|  | Education related actors | 10,26 | 89,74 | 0,11 |
|  | Youth Actors | 37,14 | 62,86 | 0,59 |
|  | Other Actors | 46,03 | 53,97 | 0,85 |
|  | Total | 51,23 | 48,77 | 1,05 |
| **Switzerland** | State actors and judiciary | 45,53 | 54,47 | 0,84 |
|  | Political parties/groups | 44,62 | 55,38 | 0,81 |
|  | Professional organizations/groups | 43,75 | 56,25 | 0,78 |
|  | Labor organizations and Economy groups | 66,67 | 33,33 | 2,00 |
|  | Education related actors | 20,65 | 79,35 | 0,26 |
|  | Youth Actors | 37,21 | 62,79 | 0,59 |
|  | Other Actors | 23,81 | 76,19 | 0,31 |
|  | Total | 36,81 | 63,19 | 0,58 |
| **UK** | State actors and judiciary | 83,04 | 16,96 | 4,90 |
|  | Political parties/groups | 87,88 | 12,12 | 7,25 |
|  | Professional organizations/groups | 97,26 | 2,74 | 35,50 |
|  | Labor organizations and Economy groups | 90,00 | 10,00 | 9,00 |
|  | Education related actors | 62,26 | 37,74 | 1,65 |
|  | Youth Actors | 46,15 | 53,85 | 0,86 |
|  | Other Actors | 88,04 | 11,96 | 7,36 |
|  | Total | 82,31 | 17,69 | 4,65 |
